# Supplementary material for: Fine cubic Cu2O nanocrystals as highly selective catalyst for propylene epoxidation with molecular oxygen
Source: PubMed Central journal article supplement (PMC8505410; doi:10.1038/s41467-021-26257-0), 2021-10-11
Supplement: 41467_2021_26257_MOESM1_ESM.pdf [file 41467_2021_26257_MOESM1_ESM.pdf]

## Supplementary Information

### Fine Cubic Cu<sub>2</sub>O Nanocrystals as Highly Selective Catalyst for Propylene Epoxidation with Molecular Oxygen

Wei Xiong<sup>1+</sup>, Xiang-Kui Gu<sup>2+</sup>, Zhenhua Zhang<sup>3</sup>, Peng Chai,<sup>1</sup> Yijing Zang,<sup>4</sup> Zongyou Yu<sup>1</sup>, Dan Li<sup>1</sup>, Hui Zhang,<sup>4</sup> Zhi Liu,<sup>4,5</sup> Weixin Huang<sup>1,6\*</sup>

<sup>1</sup> Hefei National Laboratory for Physical Sciences at the Microscale, Key Laboratory of Surface and Interface Chemistry and Energy Catalysis of Anhui Higher Education Institutes and Department of Chemical Physics, University of Science and Technology of China, Hefei 230026, P. R. China.

<sup>2</sup> School of Power and Mechanical Engineering, Wuhan University, Wuhan 430072, P. R. China

<sup>3</sup> Key Laboratory of the Ministry of Education for Advanced Catalysis Materials, Zhejiang Key Laboratory for Reactive Chemistry on Solid Surfaces, Institute of Physical Chemistry, Zhejiang Normal University, Jinhua 321004, P. R. China.

<sup>4</sup> State Key Laboratory of Functional Materials for Informatics, Shanghai Institute of Microsystem and Information Technology, Chinese Academy of Sciences, Shanghai 200050, P. R. China.

<sup>5</sup> School of Physical Science and Technology, ShanghaiTech University, Shanghai 201210, P. R. China.

<sup>6</sup> Dalian National Laboratory for Clean Energy, Dalian 116023, P. R. China.

<sup>+</sup> These authors contributed equally.

\*To whom correspondence should be addressed: [huangwx@ustc.edu.cn](mailto:huangwx@ustc.edu.cn) (WH)

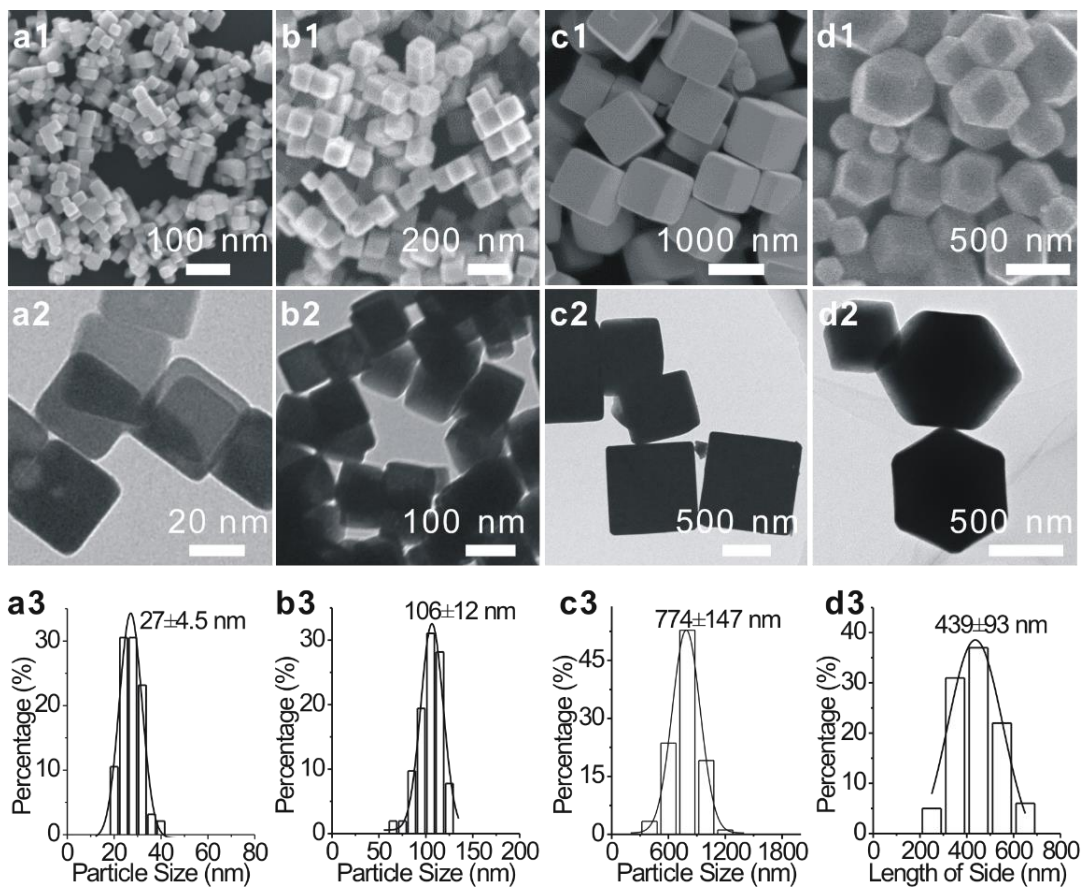

**Supplementary Figure 1.** SEM, TEM images and size distributions of **(a1-3)** c-Cu<sub>2</sub>O-27, **(b1-3)** c-Cu<sub>2</sub>O-106, **(c1-3)** c-Cu<sub>2</sub>O-774 and **(d1-3)** d-Cu<sub>2</sub>O-439.

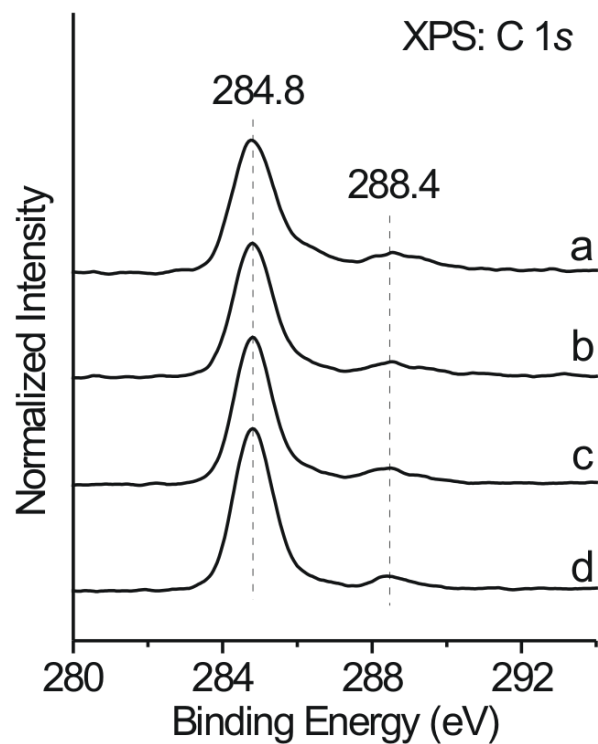

**Supplementary Figure 2.** A) C 1s XPS spectra of as-synthesized Cu<sub>2</sub>O NCs: (a) c-Cu<sub>2</sub>O-27, (b) c-Cu<sub>2</sub>O-106, (c) c-Cu<sub>2</sub>O-774, and (d) d-Cu<sub>2</sub>O-439. C 1s XPS signals at 284.8, 288.4 eV can be ascribed to the adventitious carbon and various types of carbonate species.

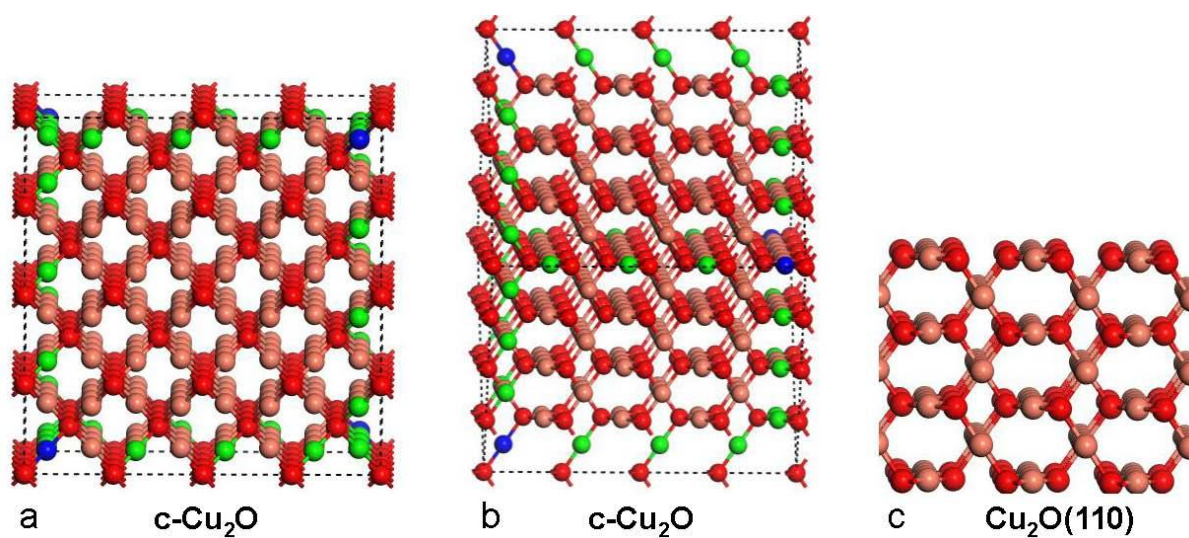

**Supplementary Figure 3.** Side (a) and edge (b) view of the structure of  $(4 \times 4 \times 4)$ - $c$ - $\text{Cu}_2\text{O}$  and side view of  $\text{Cu}_2\text{O}(110)$  (c). The orange, red, green, and blue spheres represent Cu atom, O atom, Cu atom on the edge, and Cu atom shared by three edges, respectively. The Cu and O atoms on the edges of  $c$ - $\text{Cu}_2\text{O}$  NCs exhibit the same coordination structures as those on the  $\text{Cu}_2\text{O}\{110\}$  surfaces.

**Supplementary Table 1.** Calculated densities of Cu(110) edge sites and their fractions related to total surface Cu sites on various c-Cu<sub>2</sub>O NCs.

|                                                                  | c-Cu <sub>2</sub> O-27 | c-Cu <sub>2</sub> O-106 | c-Cu <sub>2</sub> O-774 |
|------------------------------------------------------------------|------------------------|-------------------------|-------------------------|
| Fraction of Cu{110} edge sites related to total surface Cu atoms | 1.61%                  | 0.42%                   | 0.06%                   |
| Density of Cu(110) edge sites (g <sup>-1</sup> )                 | 6.44×10 <sup>18</sup>  | 4.08×10 <sup>17</sup>   | 7.84×10 <sup>15</sup>   |

Defining  $L$  (in nm) and  $a$  ( $a = 0.427$  nm) as the edge length and lattice parameter of a c-Cu<sub>2</sub>O NC, the number of Cu<sub>2</sub>O unit cell is  $(L/a)^3$ , and each Cu<sub>2</sub>O unit cell contains 4 Cu atoms, thus the total Cu atom number ( $n$ ) of a c-Cu<sub>2</sub>O NC with an edge length of  $L$  can be calculated as:

$$n = 4\left(\frac{L}{a}\right)^3 \quad (1)$$

The number of Cu atoms on each edge is  $L/a$ , and 4 Cu corner atoms are shared by three edges. Thus, the total number of Cu(110) edge sites ( $n_{\text{edge}}$ ) of a c-Cu<sub>2</sub>O NC with an edge length of  $L$  can be calculated as:

$$n_{\text{edge}} = 12\frac{L}{a} - 8 \quad (2)$$

The number of Cu<sub>2</sub>O surface unit cell is  $(L/a)^2$ , and each Cu<sub>2</sub>O surface unit cell contains 2 Cu atoms, thus the Cu surface atom number of each face of a c-Cu<sub>2</sub>O NC with an edge length of  $L$  can be calculated as  $2\left(\frac{L}{a}\right)^2$ . On each of the two basal planes of a c-Cu<sub>2</sub>O NC, the number of Cu surface atoms is  $2\left(\frac{L}{a}\right)^2$ ; on each of the two separated lateral planes (not sharing Cu atoms with each other), there are two Cu rows shared by the basal plane, and the number of Cu surface atoms is  $2\left(\frac{L}{a}\right)^2 - 2\frac{L}{a}$ ; on each of the last two lateral planes, except for sharing two Cu rows with the basal plane, it also shares one Cu atom in each Cu row with the two separated lateral planes, and the number of Cu surface atoms is  $2\left(\frac{L}{a}\right)^2 - 4\frac{L}{a} + 2$ . Thus, the total number of Cu surface atoms ( $n_{\text{surface}}$ ) of a c-Cu<sub>2</sub>O NC with an edge length of  $L$  can be calculated as:

$$n_{\text{surface}} = 12\left(\frac{L}{a}\right)^2 - 12\frac{L}{a} + 4 \quad (3)$$

Thus, the fraction ( $f$ ) of Cu{110} edge sites related to total surface Cu atoms of a c-Cu<sub>2</sub>O NC with an edge length of  $L$  can be calculated as:

$$f = \frac{n_{\text{edge}}}{n_{\text{surface}}} \quad (4)$$

The density of Cu<sub>2</sub>O is 6 g/cm<sup>3</sup>, thus the particle number ( $N$ ) of 1g c-Cu<sub>2</sub>O NCs with an edge length of  $L$  can be calculated as:

$$N = \frac{1}{6L^3} \times 10^{21} \quad (5)$$

And the density of Cu(110) edge sites ( $N_{\text{edge}}$ ) of a c-Cu<sub>2</sub>O NC with an edge length of  $L$  can be calculated as:

$$N_{\text{edge}} = \frac{1}{6L^3} \times 10^{21} \times (12 \frac{L}{a} - 8) \quad (6)$$

For our c-Cu<sub>2</sub>O NCs with size distributions shown in Figure 1, defining  $i$  as c-Cu<sub>2</sub>O NCs with a specific edge length,  $x_i$  as the fraction of c-Cu<sub>2</sub>O NCs with a specific edge length,  $f_i$  as the fraction of Cu{110} edge sites related to total surface Cu atoms of a c-Cu<sub>2</sub>O NC with a specific edge length, and  $N_{\text{edge},i}$  as the density of Cu(110) edge sites of a c-Cu<sub>2</sub>O NC with a specific edge length,

Then the fraction of Cu{110} edge sites related to total surface Cu sites of our c-Cu<sub>2</sub>O NCs can be calculated as  $\sum_i x_i f_i$

The particle number of our c-Cu<sub>2</sub>O NCs with an average edge length of  $L$  can be calculated as:

$$N = \frac{1}{6L^3} \times 10^{21} \quad (7)$$

The density of Cu{110} edge sites of our c-Cu<sub>2</sub>O NCs can be calculated as  $N \sum_i x_i n_{\text{edge},i}$

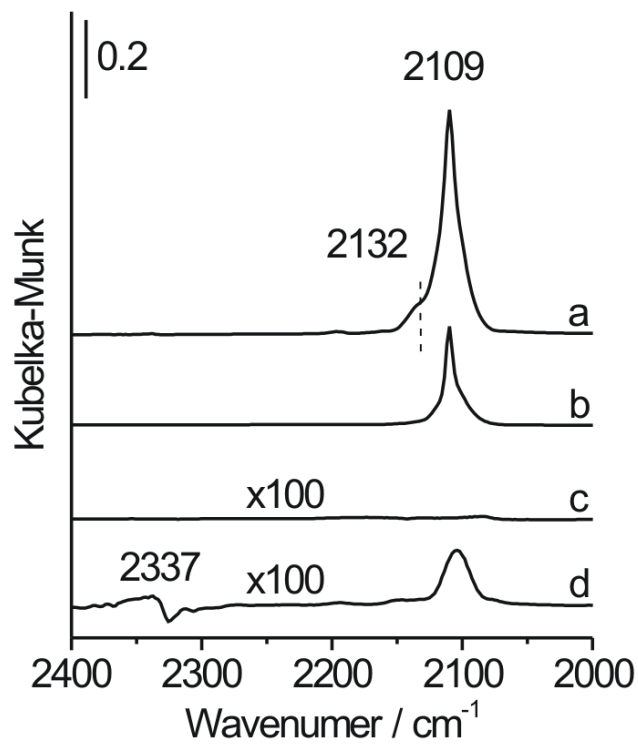

**Supplementary Figure 4.** In situ DRIFTS spectra of CO adsorption ( $P_{\text{CO}}=250$  Pa) on the  $\text{Cu}_2\text{O}$  NCs at 123 K: (a) c- $\text{Cu}_2\text{O}$ -27, (b) c- $\text{Cu}_2\text{O}$ -106, (c) c- $\text{Cu}_2\text{O}$ -774, and (d) d- $\text{Cu}_2\text{O}$ -439.

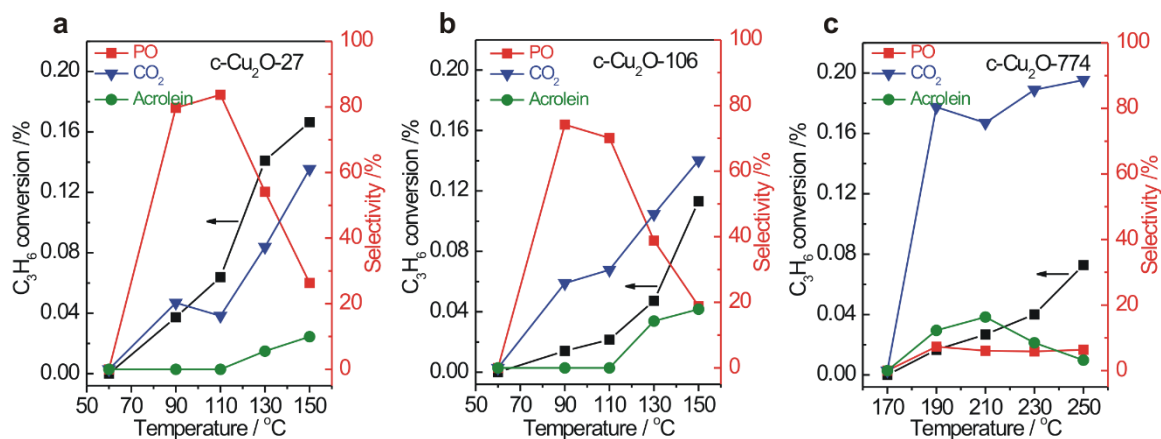

**Supplementary Figure 5.** C<sub>3</sub>H<sub>6</sub> conversion and propylene oxide (PO), acrolein and CO<sub>2</sub> selectivities of the C<sub>3</sub>H<sub>6</sub> oxidation with O<sub>2</sub> catalyzed by (a) c-Cu<sub>2</sub>O-27, (b) c-Cu<sub>2</sub>O-106 and (c) c-Cu<sub>2</sub>O-774 NCs.

Reaction condition: 200 mg catalyst, 8% C<sub>3</sub>H<sub>6</sub> and 4% O<sub>2</sub> balanced with Ar at a flow rate of 50 mL min<sup>-1</sup>.



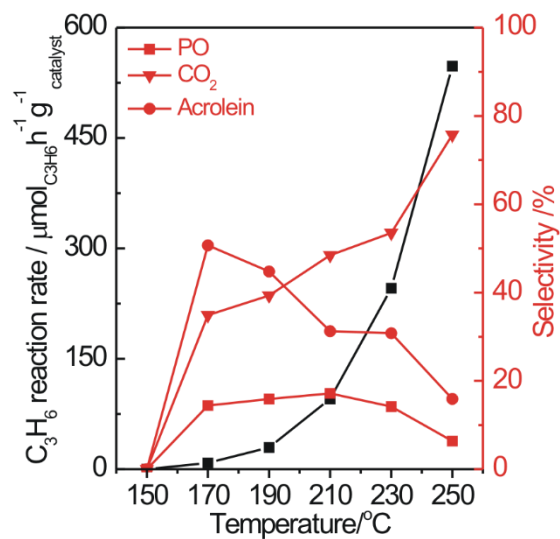

**Supplementary Figure 6.** C<sub>3</sub>H<sub>6</sub> reaction rate and propylene oxide (PO), acrolein and CO<sub>2</sub> selectivities of the C<sub>3</sub>H<sub>6</sub> oxidation with O<sub>2</sub> catalyzed by d-Cu<sub>2</sub>O-493 NCs. Reaction condition: 200 mg catalyst, 8% C<sub>3</sub>H<sub>6</sub> and 4% O<sub>2</sub> balanced with Ar at a flow rate of 50 mL min<sup>-1</sup>.

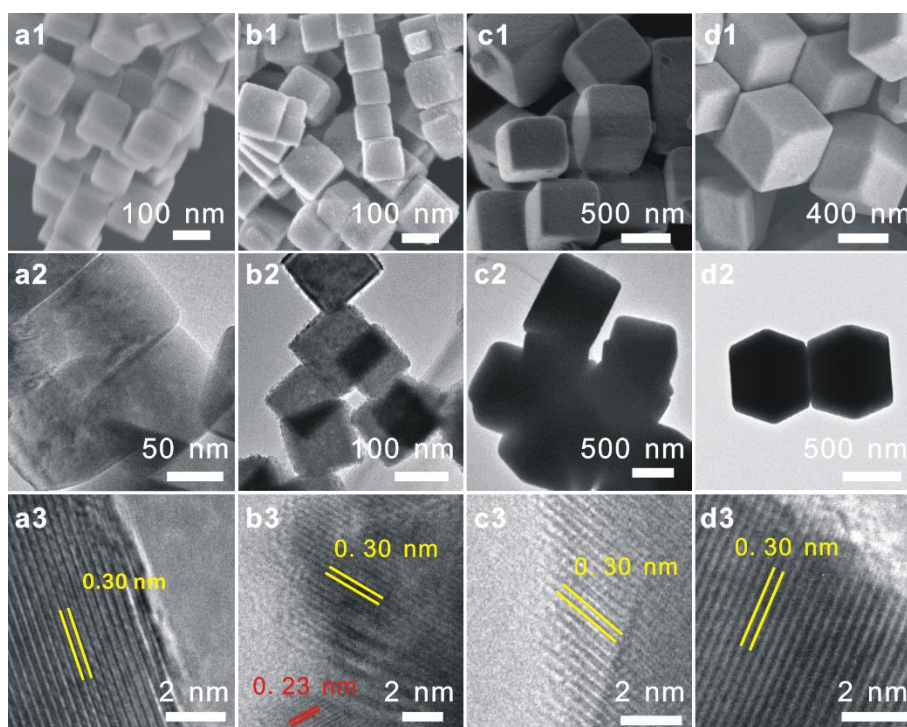

**Supplementary Figure 7.** SEM, TEM, and HRTEM images of typical  $\text{Cu}_2\text{O}$  NCs evaluated after propylene oxidation: (a1)–(a3) c- $\text{Cu}_2\text{O}$ -106 at 90 °C, (b1)–(b3) c- $\text{Cu}_2\text{O}$ -106 at 150 °C, (c1)–(c3) c- $\text{Cu}_2\text{O}$ -774 and (d1)–(d3) d- $\text{Cu}_2\text{O}$ -439 at 210 °C. The lattice fringes of 0.30 and 0.23 nm correspond to the spacing of the  $\text{Cu}_2\text{O}\{110\}$  (JCPDS card No. 78-2076) and  $\text{CuO}\{111\}$  (JCPDS card No. 89-5899) crystal planes, respectively.

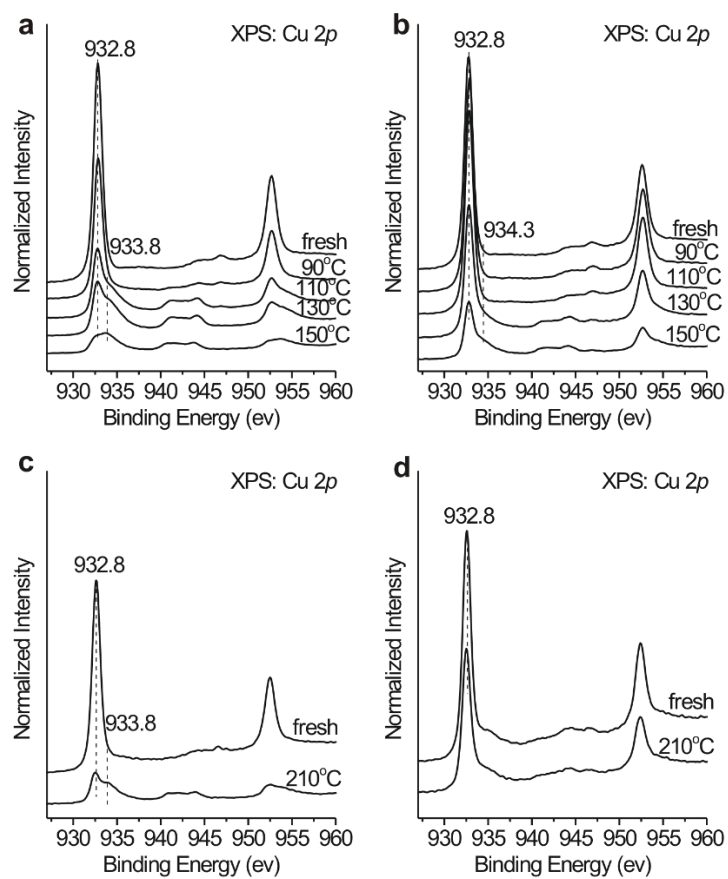

**Supplementary Figure 8.** Cu 2p XPS spectra of (a) c-Cu<sub>2</sub>O-27, (b) c-Cu<sub>2</sub>O-106, (c) c-Cu<sub>2</sub>O-774 and (d) d-Cu<sub>2</sub>O-439 NCs evaluated at different reaction temperatures.

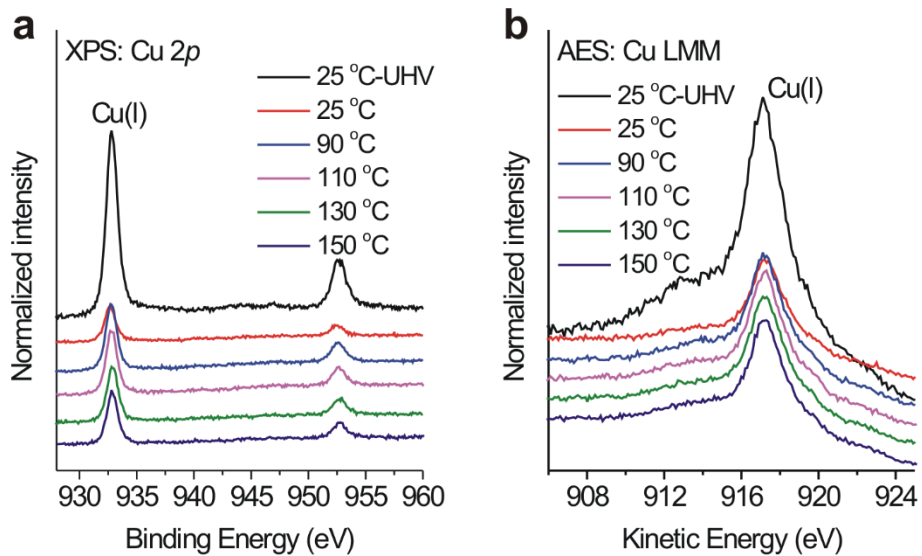

**Supplementary Figure 9.** (a) Cu 2p NAP-XPS and (b) Cu LMM NAP-AES spectra of c-Cu<sub>2</sub>O-27 NCs under 0.6 mbar C<sub>3</sub>H<sub>6</sub>+ 0.3 mbar O<sub>2</sub> at different reaction temperatures. The used photon energy is 1150 eV. Corresponding spectra under ultrahigh vacuum condition are also shown.

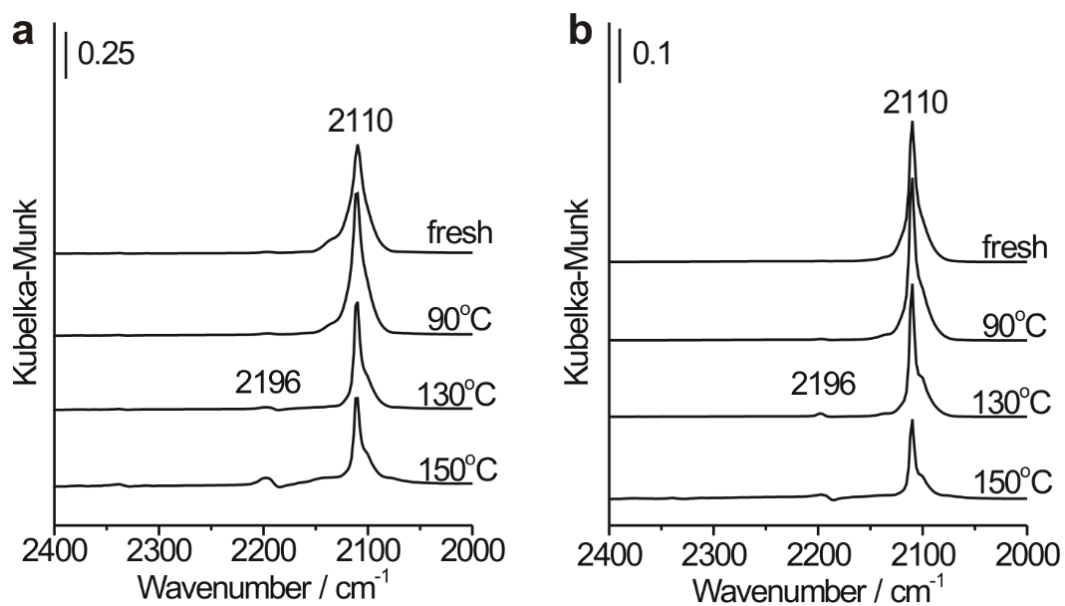

**Supplementary Figure 10.** In situ DRIFTS spectra of CO adsorption ( $P_{\text{CO}}=250$  Pa) at 123 K on (a) c-Cu<sub>2</sub>O-27 and (b) c-Cu<sub>2</sub>O-106 subjected to C<sub>3</sub>H<sub>6</sub> oxidation reaction at different temperatures.

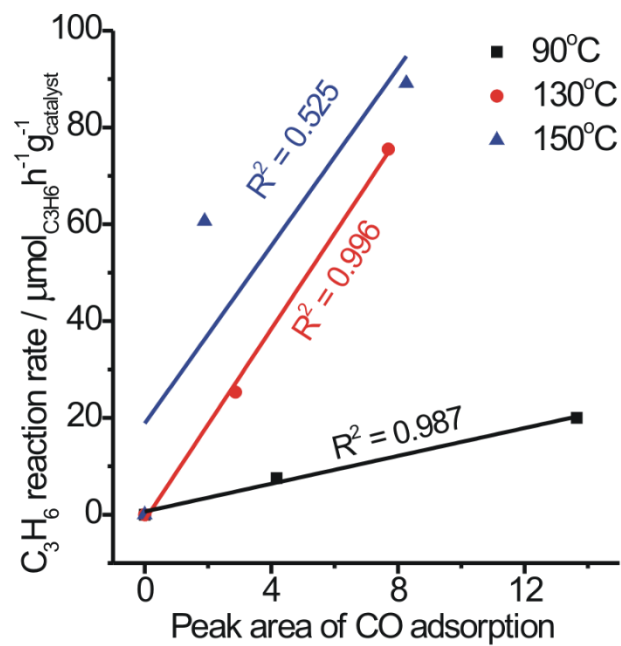

**Supplementary Figure 11.** C<sub>3</sub>H<sub>6</sub> reaction rate of c-Cu<sub>2</sub>O-27 and c-Cu<sub>2</sub>O-106 at different temperature as a function of the peak area of CO adsorbed on Cu<sub>2</sub>O{110} edge sites of c-Cu<sub>2</sub>O-27 and c-Cu<sub>2</sub>O-106 derived from corresponding DRIFTS results.

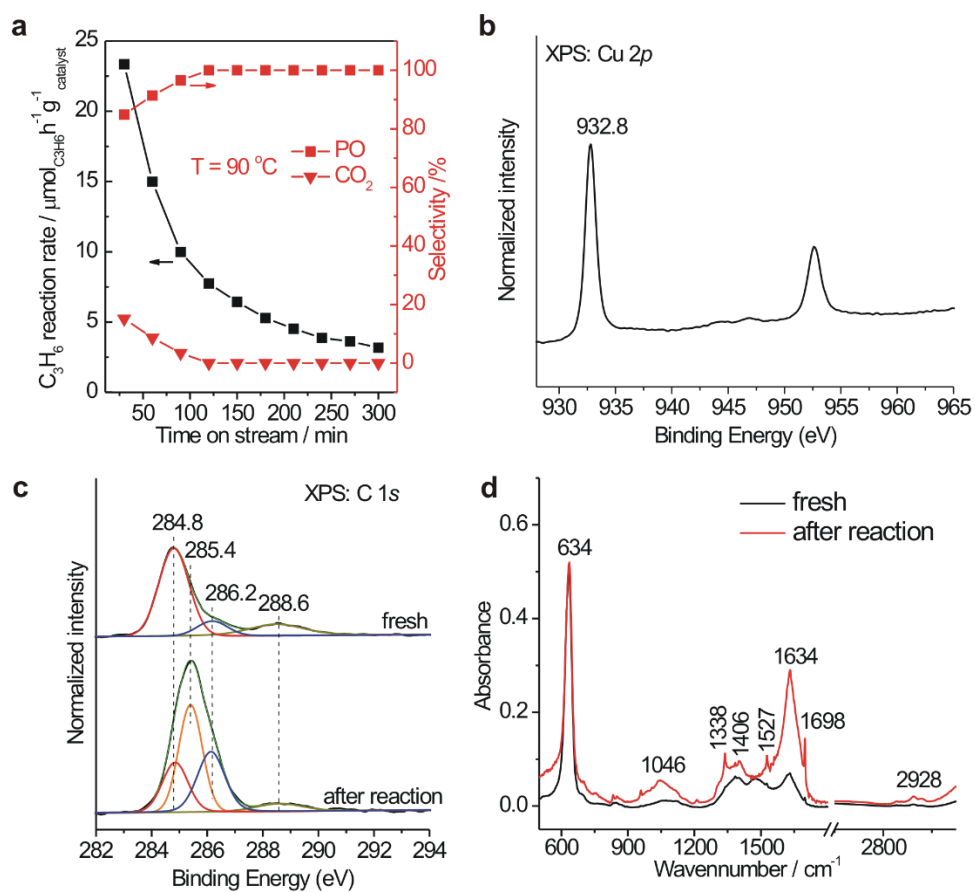

**Supplementary Figure 12.** (a) Stability of c-Cu<sub>2</sub>O-27 in catalyzing C<sub>3</sub>H<sub>6</sub> oxidation with molecular oxygen. (b) Cu 2p XPS spectra of c-Cu<sub>2</sub>O-27 after the catalytic stability test at 90 °C. (c) C 1s XPS spectra and (d) Transmission infrared of c-Cu<sub>2</sub>O-27 before and after the catalytic stability test at 90 °C.

**Supplementary Table 2.** Assignment of vibrational bands observed in the DRIFTS spectra.

| Assignment                                                                                                                                                             | Wavenumber / cm <sup>-1</sup> | Ref.    |
|------------------------------------------------------------------------------------------------------------------------------------------------------------------------|-------------------------------|---------|
| $\nu(\text{CH}_3)$ in $\text{C}_3\text{H}_6$ gas                                                                                                                       | 2954                          | 2,3     |
| $\nu(\text{CH}_3)$ in $\text{C}_3\text{H}_6(\text{a})_{\text{Cu}}$ , $\text{C}_3\text{H}_6(\text{a})_{\text{Cu,O}}$ &<br>$\text{C}_3\text{H}_6(\text{a})_{\text{O,O}}$ | 2925, 2860                    | 4       |
| $\nu(\text{C-H})$ in $\text{HCOO}(\text{a})$                                                                                                                           | 2960, 2885                    | 5       |
| $\nu(\text{CH}_2)$ in $\text{C}_3\text{H}_5(\text{a})_{\text{O}}$                                                                                                      | 2834                          | 6       |
| $\nu_{\text{as}}(\text{CO}_2(\text{a}))$                                                                                                                               | 2338, 2190                    | 7       |
| $\nu(\text{C=C})$ in $\text{C}_3\text{H}_6$ gas & $\text{CH}_2=\text{CH-CHO}(\text{a})$                                                                                | 1652                          | 2-4,8,9 |
| $\nu(\text{C=C})$ in $\text{C}_3\text{H}_5(\text{a})_{\text{O}}$                                                                                                       | 1608                          | 4,10    |
| $\nu(\text{C=C})$ in $\text{C}_3\text{H}_6(\text{a})_{\text{Cu}}$                                                                                                      | 1590                          | 1,11    |
| $\nu(\text{C-O})$ in $\text{HCOO}(\text{a})$                                                                                                                           | 1567, 1368                    | 4-6,    |
| $\nu(\text{C=C})$ in $\text{C}_3\text{H}_6(\text{a})_{\text{Cu,O}}$ & $\text{C}_3\text{H}_6(\text{a})_{\text{O,O}}$                                                    | 1462                          | 1       |
| $\nu_{\text{as}}(\text{C-C-C})$ in $\text{C}_3\text{H}_5(\text{a})_{\text{Cu}}$                                                                                        | 1434                          | 1,4     |
| $\delta(-\text{CH}_3)$                                                                                                                                                 | 1398                          | 4,6     |
| $\delta(\text{C-H})$                                                                                                                                                   | 1272, 1252                    | 1,4     |



**Supplementary Table 3.** Calculated barrier ( $E_a$ ), reaction enthalpy( $\Delta E$ ), and Gibbs free energy change ( $\Delta G$ ) of the key elementary steps for propylene oxidation to propylene oxide (PO) and acrolein on  $\text{Cu}_2\text{O}\{110\}$ .

| Reaction step                                                                                                | $E_a/\text{eV}$ | $\Delta E/\text{eV}$ | $\Delta G/\text{eV}$ |
|--------------------------------------------------------------------------------------------------------------|-----------------|----------------------|----------------------|
| $\text{CH}_3\text{CHCH}_2^* \rightarrow \text{CH}_3\text{CHCH}_2^*$                                          | -               | -0.53                | -0.02                |
| $\text{CH}_3\text{CHCH}_2^* \rightarrow \text{PO}^* + \text{V}_\text{O}$                                     | 1.48            | 1.28                 | 1.41                 |
| $\text{O}_2 + \text{V}_\text{O} + ^* \rightarrow \text{O}_2^*/\text{V}_\text{O}$                             | -               | -1.65                | -0.95                |
| $\text{O}_2^*/\text{V}_\text{O} + ^* \rightarrow \text{O}^* + \text{O}^*(\text{lattice})$                    | 0.32            | -0.98                | -0.92                |
| $\text{CH}_3\text{CHCH}_2 + \text{O}^* \rightarrow \text{CH}_3\text{CHCH}_2\text{O}^*$                       | -               | -0.56                | -0.05                |
| $\text{CH}_3\text{CHCH}_2\text{O}^* \rightarrow \text{PO}^*$                                                 | 0.37            | -0.98                | -1.03                |
| $\text{CH}_3\text{CHCH}_2 + \text{O}_2 + ^* \rightarrow \text{OOMP}^*$                                       | -               | -0.34                | -0.07                |
| $\text{OOMP}^* + ^* \rightarrow \text{PO}^* + \text{O}^*$                                                    | 0.68            | -1.88                | -1.87                |
| $\text{CH}_3\text{CHCH}_2^* + ^* \rightarrow \text{CH}_2\text{CHCH}_2^* + \text{H}^*$                        | 0.75            | -0.17                | -0.05                |
| $\text{CH}_2\text{CHCH}_2^* + \text{O}^*(\text{lattice}) \rightarrow \text{CH}_2\text{CHCHO}^* + \text{H}^*$ | 1.05            | -0.84                | -0.77                |
| $\text{CH}_2\text{CHCHO}^* \rightarrow \text{CH}_2\text{CHCHO}^* + \text{V}_\text{O}$                        | 0.96            | 0.96                 | 0.48                 |

Gibbs free energy change is calculated using equation 8.

$$\Delta G = \Delta E + \Delta ZPE - T\Delta S \quad (8)$$

The most important entropic contributions are assumed from the translational and vibrational entropies, which are calculated at 373 K and standard pressure as an example using equations 9 and 10, respectively.

$$S_{\text{trans}} = 1.5R \ln(2\pi M k_b T) - 3R \ln h + R \ln(k_b T / P) + 2.5R \quad (9)$$

$$S_{\text{vib}} = R \left[ \frac{hv}{k_b T} \left( e^{\frac{hv}{k_b T}} - 1 \right)^{-1} - \ln \left( 1 - e^{-\frac{hv}{k_b T}} \right) \right] \quad (10)$$

where  $M$ ,  $R$ ,  $k_b$ ,  $h$ ,  $T$ ,  $P$ , and  $v$  are molecular weight, ideal gas constant, Boltzmann constant, Planck constant, temperature, pressure, and calculated vibrational frequencies, respectively.

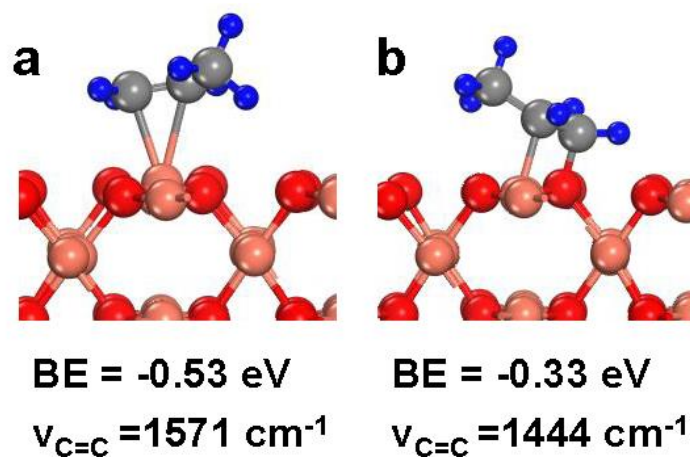

**Supplementary Figure 13.** Optimized geometries for propylene adsorption on  $\text{Cu}_2\text{O}(110)$ : (a)  $\text{C}_3\text{H}_6$  binding to a surface Cu atom via its two carbon atoms from  $-\text{CH}_2$  and  $-\text{CH}$  groups and (b)  $\text{C}_3\text{H}_6$  binding to a surface Cu and a surface O atoms via its two carbon atoms from  $-\text{CH}_2$  and  $-\text{CH}$  groups. The orange, red, gray, and blue spheres represent Cu, O, C, and H atoms, respectively.

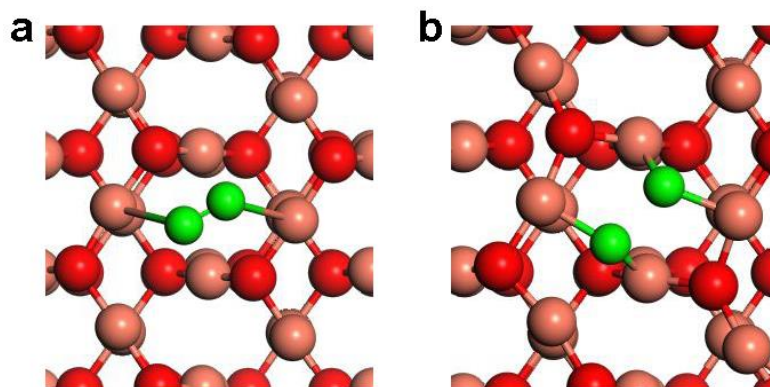

**Supplementary Figure 14.** Optimized structures of adsorbed O<sub>2</sub> (**a**) and the transition state of O<sub>2</sub> dissociation (**b**) on perfect Cu<sub>2</sub>O(110). The orange, green, and red spheres represent Cu, O in O<sub>2</sub>, and O atoms, respectively.

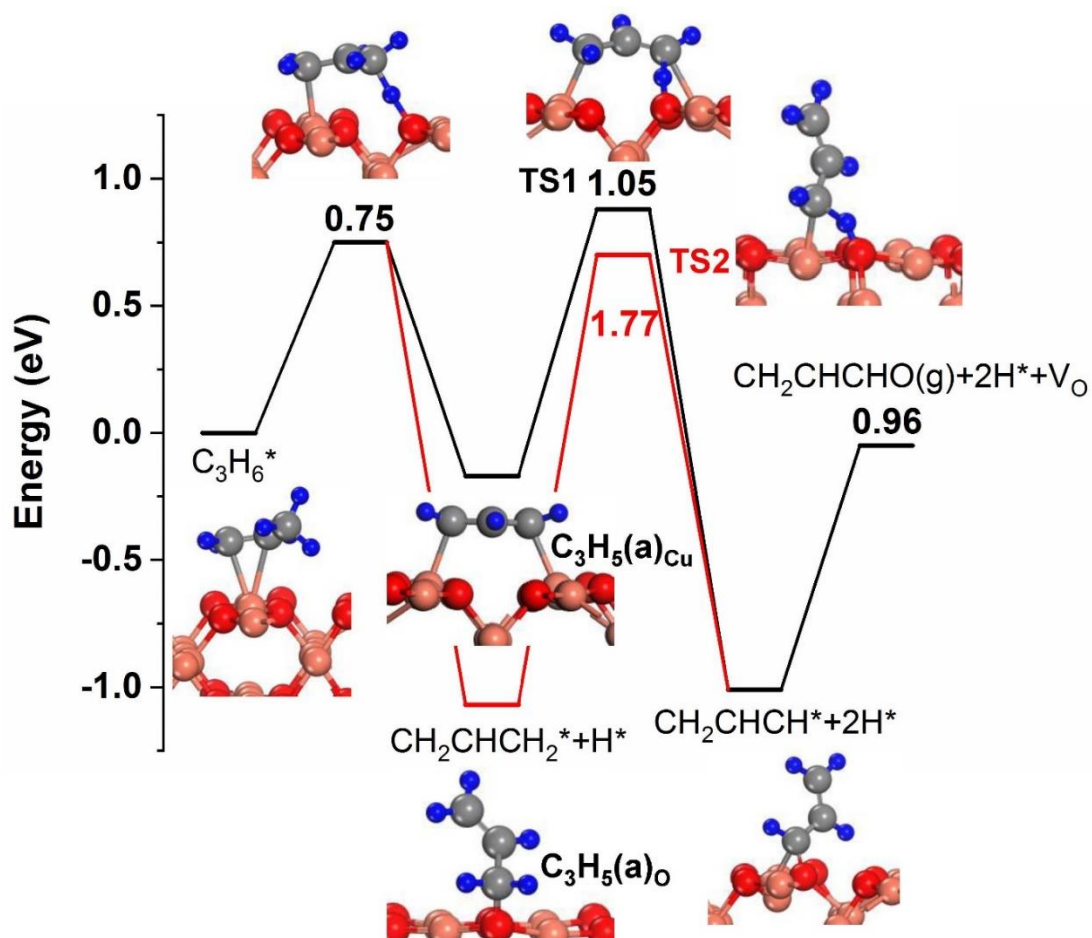

**Supplementary Figure 15.** Energy profile along with the optimized structures of intermediates and transition states for acrolein formation on Cu<sub>2</sub>O(110). The orange, red, gray, and blue spheres represent Cu, O, C, and H atoms, respectively.

## Supplementary references

1. Hua, Q. *et al.* Crystal-plane-controlled selectivity of Cu<sub>2</sub>O catalysts in propylene oxidation with molecular oxygen. *Angew. Chem. Int. Ed.* **53**, 4856–4861 (2014).
2. Huang, W. X. & White, J. M. Transition from  $\pi$ -bonded to di- $\sigma$  metallacyclic propene on O-modified Ag(111). *Langmuir* **18**, 9622–9624 (2002).
3. Silvi, B., Labarbe, P., & Perchard, J. P. *Spectrochim. Acta A* **29**, 263–276 (1973).
4. Davydov, A. A., Mikhaltchenko, V. G., Sokolovskii, V. D., & Boreskov, G. K. Surface complexes of propylene and their role in catalytic oxidation. *J. Catal.* **55**, 299–313 (1978).
5. Wang, Y. *et al.* Exploring the ternary interactions in Cu-ZnO-ZrO<sub>2</sub> catalysts for efficient CO<sub>2</sub> hydrogenation to methanol. *Nat. Commun.* **10**, 1166 (2019).
6. Gerei, S. V., Rozhkova, E. V., & Gorokhovatsky, Y. B. Propylene and oxygen chemisorption on cupric oxide and cuprous oxide catalysts. *J. Catal.* **28**, 341–350 (1973).
7. Chen, S. *et al.* Probing surface structures of CeO<sub>2</sub>, TiO<sub>2</sub>, and Cu<sub>2</sub>O nanocrystals with CO and CO<sub>2</sub> chemisorption. *J. Phys. Chem. C.* **120**, 21472–21485 (2016).
8. E. Finocchio, G. Busca, V. Lorenzelli, R. J. Willey, FTIR studies on the selective oxidation and combustion of light hydrocarbons at metal oxide surfaces. *J. Chem. Soc. – Faraday Trans.* **90**, 3347 (1994).
9. Grabowski, R., Haber, J., & Sloczynski, J. IR-spectroscopic studies of the interaction of propylene and acrolein with a CoMoO<sub>4</sub> catalyst. *React. Kinet. Catal. Lett.* **12**, 119–124 (1979).
10. Wang, Y., Zheng, W., Chen, F., & Zhan, X. Mechanistic study of propylene oxidation over a Bi–molybdate catalyst by in situ DRIFTS and probe molecules. *Appl. Catal., A* **351**, 75–81 (2008).
11. Su, W., Wang, S., Ying, P., Feng, Z. & Li, C. A molecular insight into propylene epoxidation on Cu/SiO<sub>2</sub> catalysts using O<sub>2</sub> as oxidant. *J. Catal.* **268**, 165–174 (2009).
